# Supplementary material for: Halide vacancy passivation in cesium lead halide perovskite nanocrystals with mixed halide compositions: the impact of prolonged reaction time
Source: Royal Society of Chemistry journal article supplement (doi:10.1039/d5ta01550b), 2025-01-01
Supplement: d5ta01550b1.pdf [file d5ta01550b1.pdf]

## Supplementary Information

### Halide Vacancy Passivation in Cesium Lead Halide Perovskite

### Nanocrystals with Mixed Halide Compositions: The Impact of Prolonged Reaction Time

Yeongcheol Kim, ‡ <sup>a,b</sup> Seongwoo Cho, ‡ <sup>a,c</sup> Seohee Park, <sup>a,c</sup> Min Ju Kim, <sup>a,d</sup> Younghoon Kim, <sup>e</sup> Gui-Min Kim, <sup>f</sup> Doh C. Lee, <sup>f</sup> Sung Nam Lim, <sup>a,b,j</sup> Shin Ae Song, <sup>a,b</sup> Cheolsang Youn, <sup>g</sup> Seongho Lee, <sup>b,i</sup> Seong-Yong Cho, <sup>b,d,\*</sup> Sohee Jeong, <sup>c,\*</sup> Seunghyun Lee, <sup>b,h,\*</sup> and Ju Young Woo <sup>a,b,j,\*</sup>

<sup>a</sup> Autonomous Manufacturing & Process R&D Department, Korea Institute of Industrial Technology (KITECH), Ansan 15588, Republic of Korea

<sup>b</sup> HYU-KITECH Joint Department, Hanyang University, Ansan 15588, Republic of Korea

<sup>c</sup> Department of Energy Science (DOES), Center for Artificial Atoms, Institute of Energy Science and Technology (SIEST), Sungkyunkwan University (SKKU), Suwon 16419, Republic of Korea

<sup>d</sup> Department of Photonics and Nanoelectronics, Hanyang University ERICA, Ansan 15588, Republic of Korea

<sup>e</sup> Department of Chemistry, Kookmin University, Seoul 02707, Republic of Korea

<sup>f</sup> Department of Chemical and Biomolecular Engineering, KAIST Institute for the NanoCentury, Korea Advanced Institute of Science and Technology (KAIST), Daejeon 34141, Republic of Korea

<sup>g</sup> Reliability Research Center, FITI Testing & Research Institute, 79, Magokjungang 8-ro 3-gil, Gangseo-gu, Seoul, Republic of Korea

<sup>h</sup> Department of Energy and Bio Sciences, Department of Applied Chemistry, Hanyang University ERICA, Ansan 15588, Republic of Korea

<sup>i</sup> Department of Applied Physics, Hanyang University, Ansan 15588, Republic of Korea

<sup>j</sup> School of Integrative Engineering, Chung-Ang University, Seoul 06974, Republic of Korea

‡Y.K and ‡S.C contributed equally

**\*Corresponding Authors**

Dr. Ju Young Woo ([jywoo@kitech.re.kr](mailto: jywoo@kitech.re.kr))

Prof. Seunghyun Lee ([leeshyun@hanyang.ac.kr](mailto: leeshyun@hanyang.ac.kr))

Prof. Sohee Jeong ([s.jeong@skku.edu](mailto: s.jeong@skku.edu))

Prof. Seong-Yong Cho ([seongyongcho@hanyang.ac.kr](mailto: seongyongcho@hanyang.ac.kr))

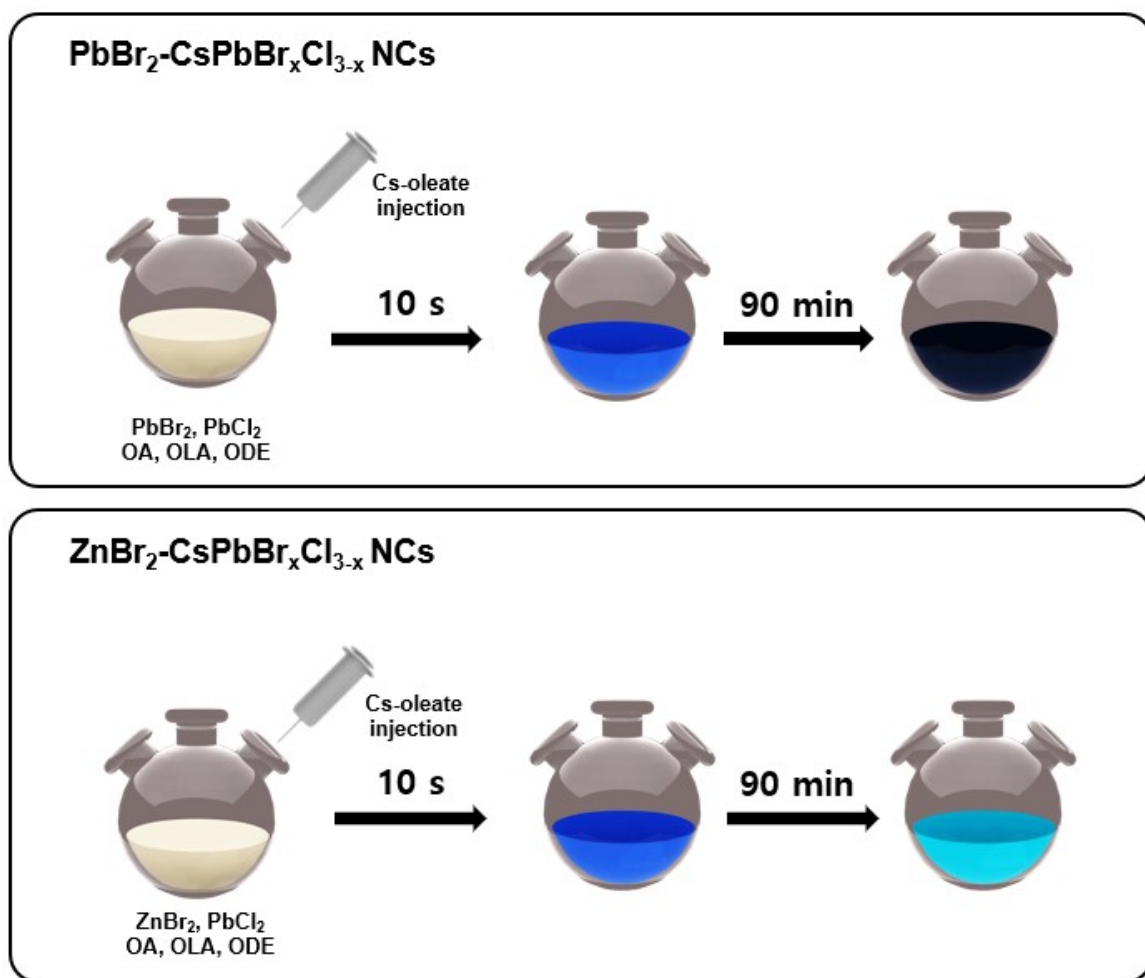

**Scheme S1.** Schematic illustration for the synthesis of (top) ZnBr<sub>2</sub>-CsPbBr<sub>x</sub>Cl<sub>3-x</sub> and (bottom) PbBr<sub>2</sub>-CsPbBr<sub>x</sub>Cl<sub>3-x</sub> NCs.

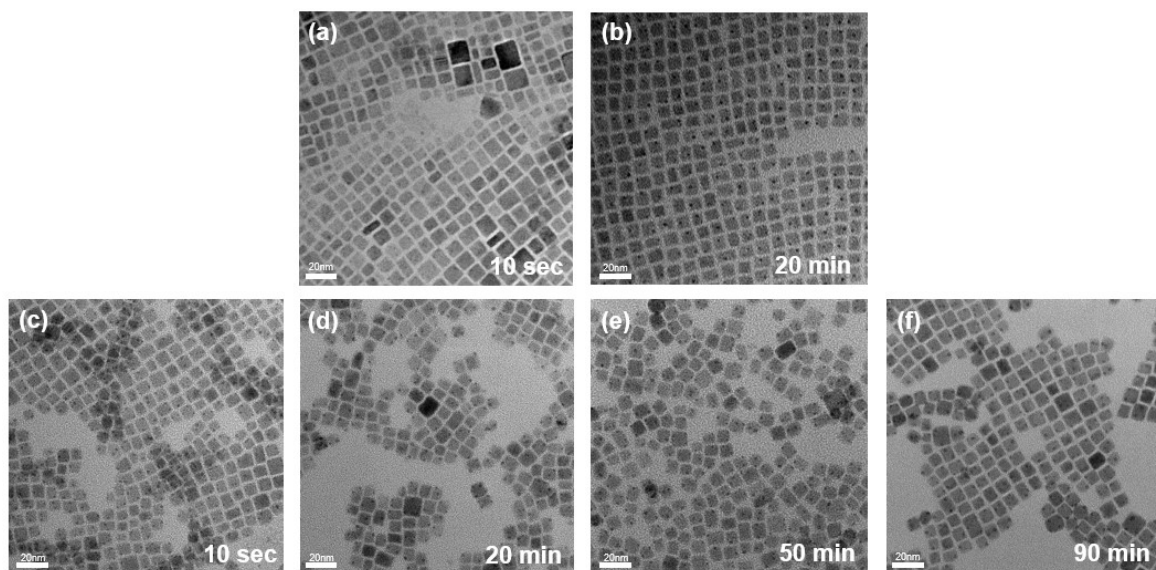

**Fig. S1.** TEM images of (a)-(b)  $\text{PbBr}_2\text{-CsPbBr}_x\text{Cl}_{3-x}$  NCs and (c)-(f)  $\text{ZnBr}_2\text{-CsPbBr}_x\text{Cl}_{3-x}$  NCs with different reaction time.

**Table S1.** Size analysis data of perovskite NCs with different reaction times. The sizes were measured based on TEM images

| Perovskite NCs                                                  | Size       |
|-----------------------------------------------------------------|------------|
| PbBr <sub>2</sub> -CsPbBr <sub>x</sub> Cl <sub>3-x</sub> 10 sec | 10.5 ± 1.0 |
| PbBr <sub>2</sub> -CsPbBr <sub>x</sub> Cl <sub>3-x</sub> 20 min | 10.5 ± 1.8 |
| ZnBr <sub>2</sub> -CsPbBr <sub>x</sub> Cl <sub>3-x</sub> 10 sec | 10.5 ± 2.0 |
| ZnBr <sub>2</sub> -CsPbBr <sub>x</sub> Cl <sub>3-x</sub> 20 min | 10.5 ± 1.4 |
| ZnBr <sub>2</sub> -CsPbBr <sub>x</sub> Cl <sub>3-x</sub> 50 min | 10.5 ± 2.1 |
| ZnBr <sub>2</sub> -CsPbBr <sub>x</sub> Cl <sub>3-x</sub> 90 min | 10.4 ± 2.0 |

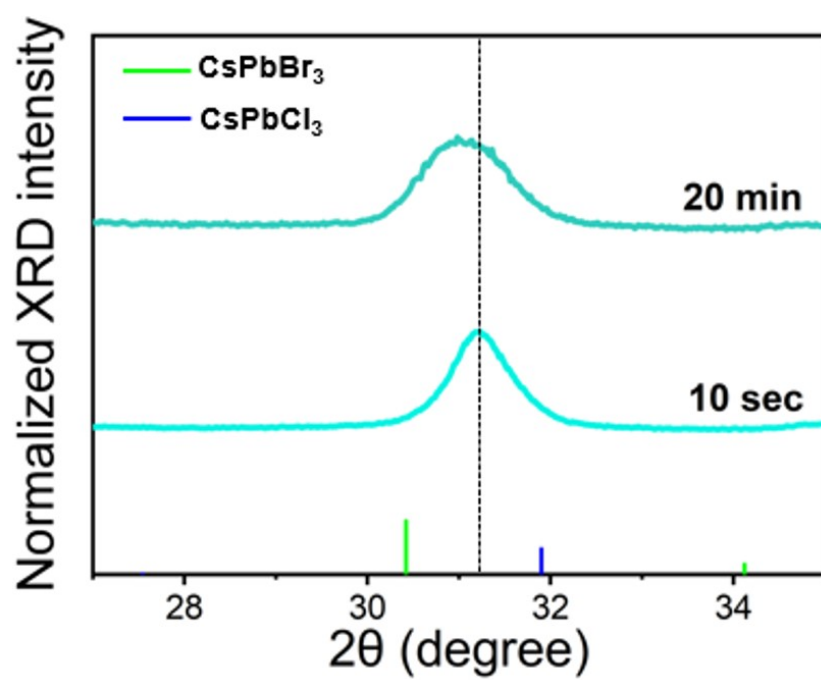

**Fig. S2.** XRD patterns of  $\text{PbBr}_2\text{-CsPbBr}_x\text{Cl}_{3-x}$  NCs with the reaction time of (bottom) 10 sec and (top) 20 min, respectively.

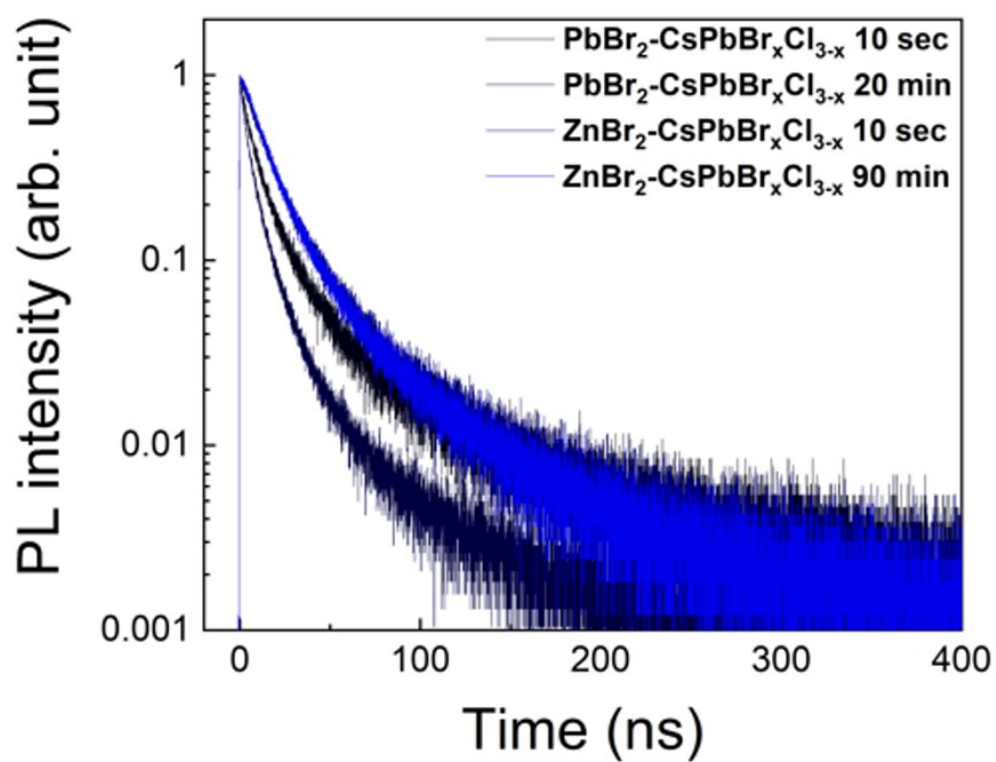

**Fig. S3.** TRPL decay curves of  $\text{ZnBr}_2\text{-CsPbBr}_x\text{Cl}_{3-x}$  NCs and  $\text{PbBr}_2\text{-CsPbBr}_x\text{Cl}_{3-x}$  NCs with different reaction time.

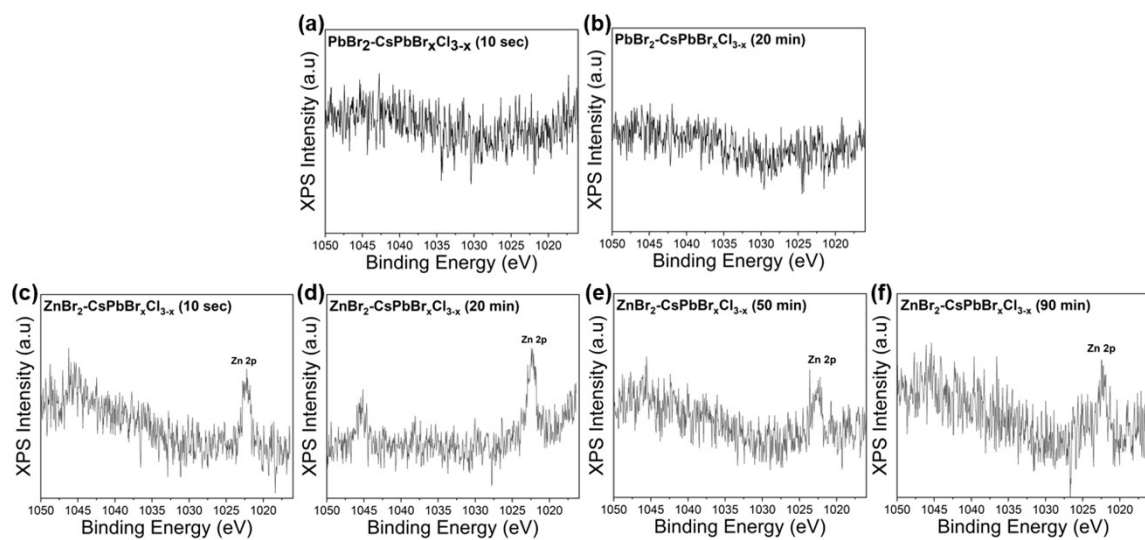

**Fig. S4.** XPS Zn 2p spectrum of (a)-(b) PbBr<sub>2</sub>-CsPbBr<sub>x</sub>Cl<sub>3-x</sub> NCs and (c)-(f) ZnBr<sub>2</sub>-CsPbBr<sub>x</sub>Cl<sub>3-x</sub> NCs with different reaction time.



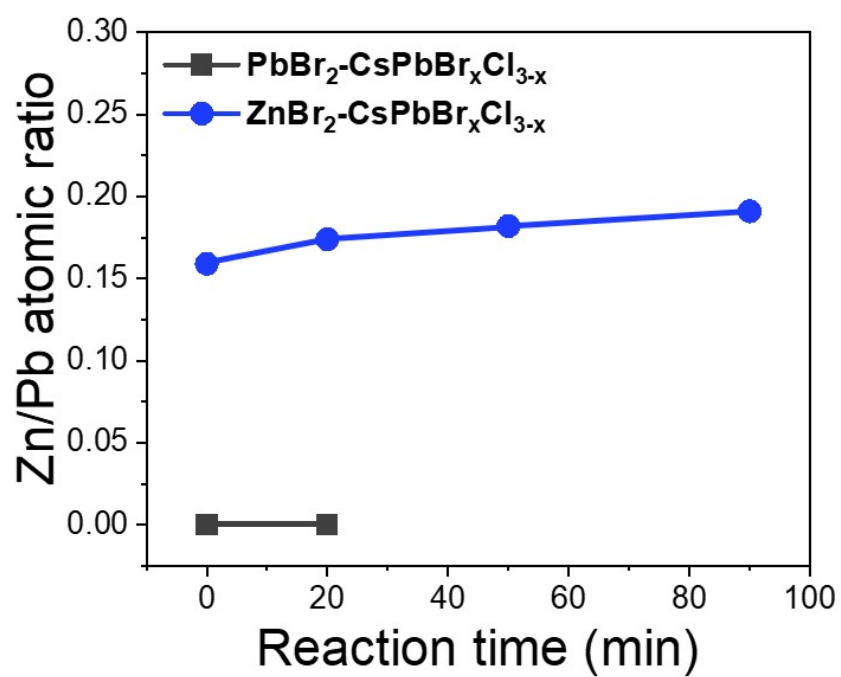

**Fig. S5.** Zn/Pb atomic ratio obtained from XPS analysis for  $\text{ZnBr}_2\text{-CsPbBr}_x\text{Cl}_{3-x}$  NCs and  $\text{PbBr}_2\text{-CsPbBr}_x\text{Cl}_{3-x}$  NCs from XPS at different reaction times.

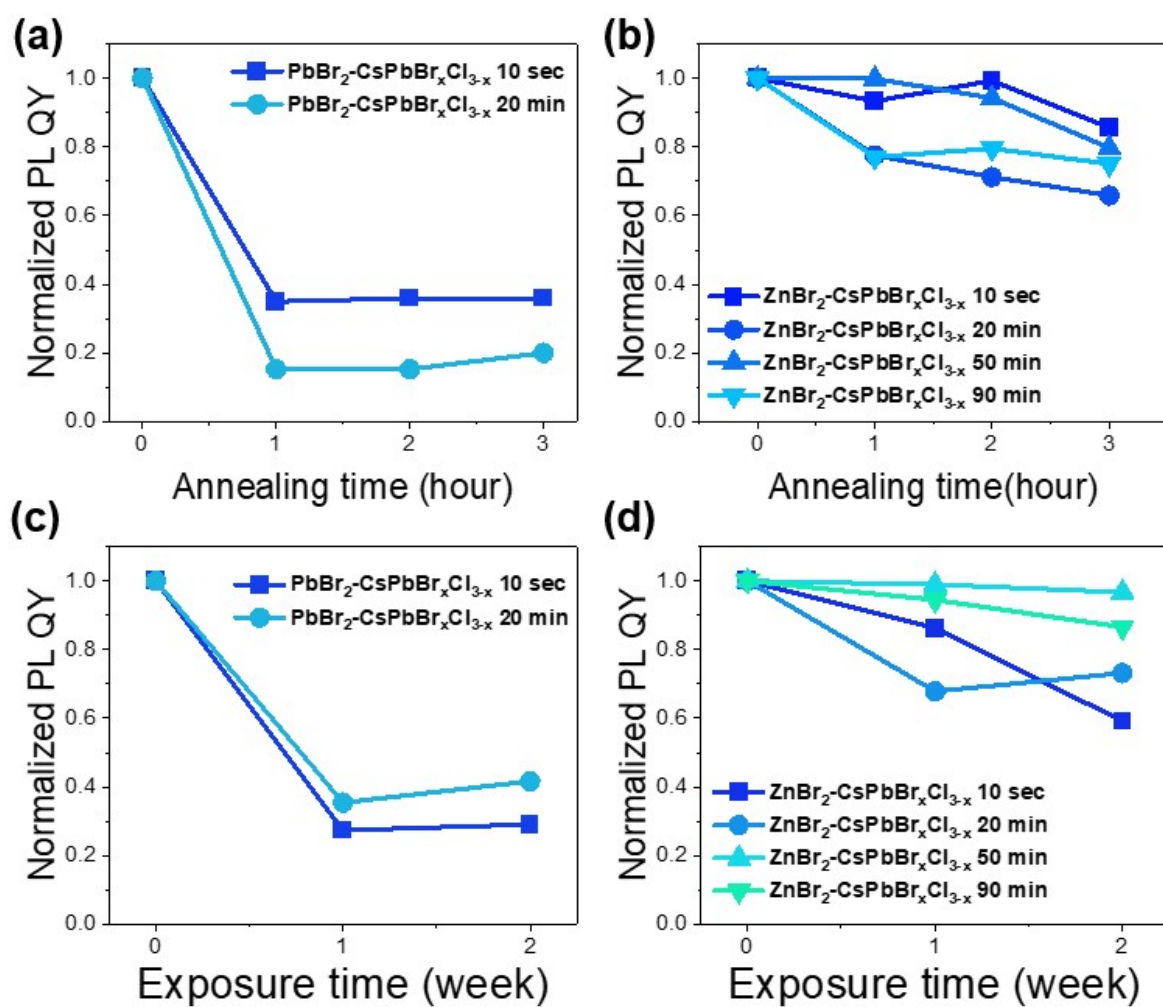

**Fig. S6.** (a-b) Thermal stability at 70°C and (c-d) air stability results of CsPbBr<sub>x</sub>Cl<sub>3-x</sub> NCs depending on reaction time.

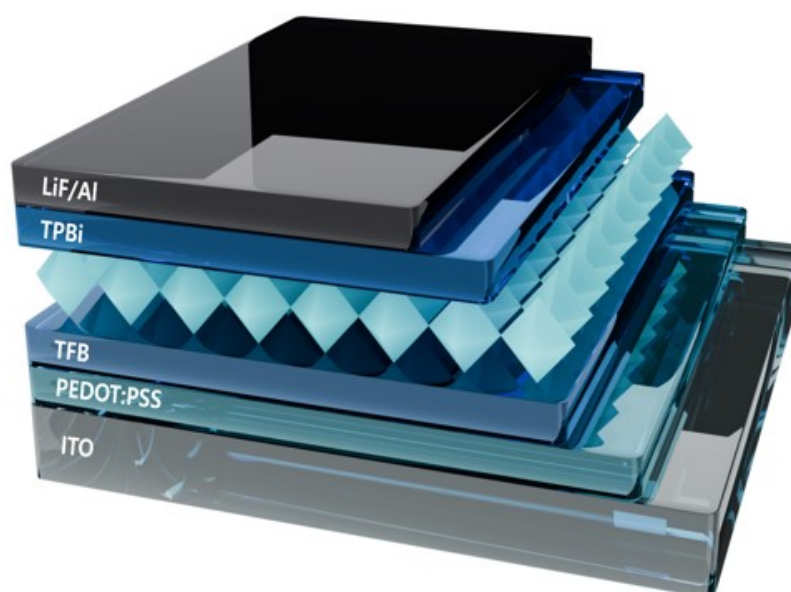

**Scheme S2.** Schematic illustration for the structure of electroluminescent LED devices which employed in our study.

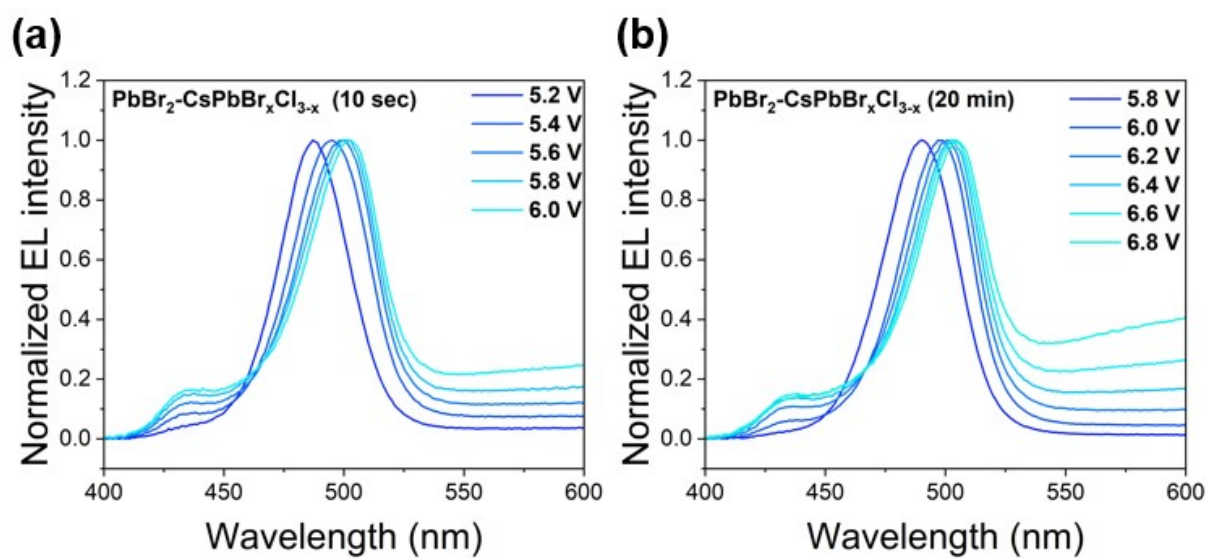

**Fig. S7.** Normalized EL spectra of LEDs based on  $\text{PbBr}_2\text{-CsPbBr}_x\text{Cl}_{3-x}$  NCs prepared with the reaction time of (a) 10 sec and (b) 20 min, respectively, at various operating voltage.

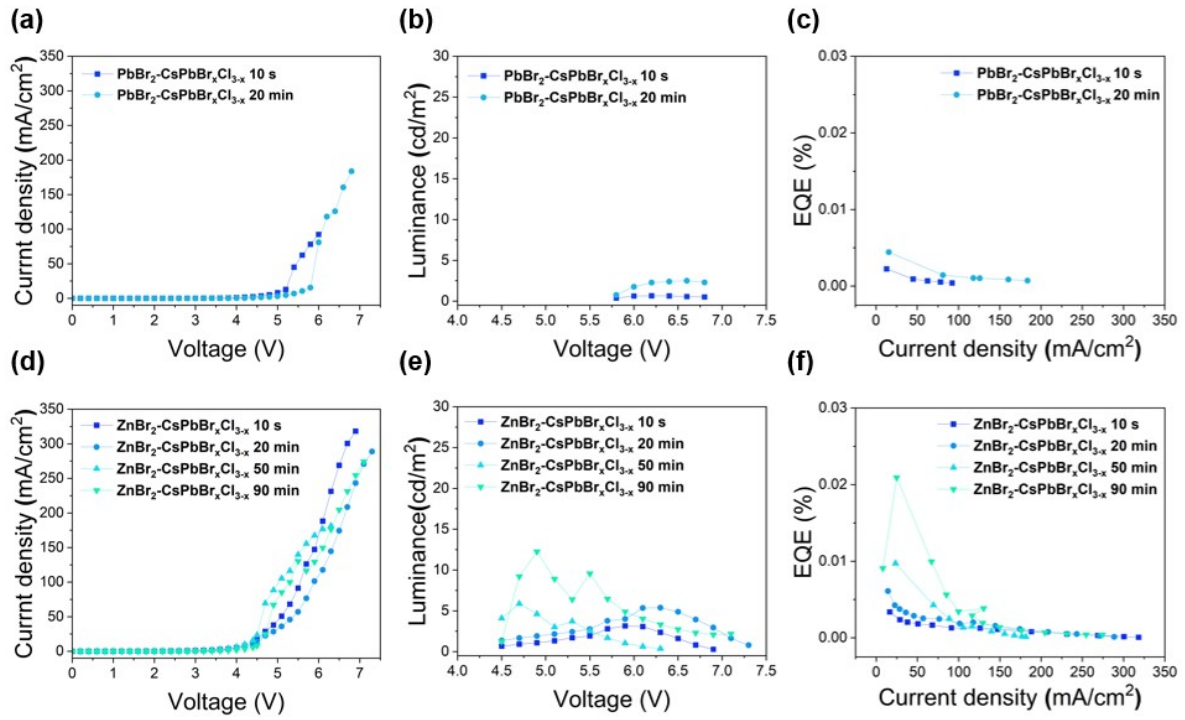

**Fig. S8.** EL performance of LEDs. The  $\text{ZnBr}_2\text{-CsPbBr}_x\text{Cl}_{3-x}$  NCs of (a) current density-voltage curves, (b) luminance-voltage curves (c) EQE-current density curves and  $\text{PbBr}_2\text{-CsPbBr}_x\text{Cl}_{3-x}$  NCs (d) current density-voltage curves, (e) luminance-voltage curves (f) EQE-current density curves.

**Table S2.** Summary of TRPL decay data for perovskite nanocrystals with different reaction times.

| Perovskite NCs                                                  | A <sub>1</sub> | $\tau_1$ | A <sub>2</sub> | $\tau_2$ | A <sub>3</sub> | $\tau_3$ | $\tau_{avg}$ |
|-----------------------------------------------------------------|----------------|----------|----------------|----------|----------------|----------|--------------|
| ZnBr <sub>2</sub> -CsPbBr <sub>x</sub> Cl <sub>3-x</sub> 10 s   | 0.4            | 13.2     | 0.4            | 13.2     | 0.2            | 44.6     | 18.7         |
| ZnBr <sub>2</sub> -CsPbBr <sub>x</sub> Cl <sub>3-x</sub> 20 min | 0.5            | 14.8     | 0.5            | 14.8     | 0.1            | 58.7     | 19.8         |
| ZnBr <sub>2</sub> -CsPbBr <sub>x</sub> Cl <sub>3-x</sub> 50 min | 0.5            | 15.3     | 0.6            | 15.3     | 0.1            | 54.8     | 19.9         |
| ZnBr <sub>2</sub> -CsPbBr <sub>x</sub> Cl <sub>3-x</sub> 90 min | 0.5            | 13.5     | 0.4            | 13.5     | 0.1            | 48.2     | 18.3         |
| PbBr <sub>2</sub> -CsPbBr <sub>x</sub> Cl <sub>3-x</sub> 10 s   | 0.2            | 1.8      | 0.6            | 8.5      | 0.2            | 29.8     | 11.5         |
| PbBr <sub>2</sub> -CsPbBr <sub>x</sub> Cl <sub>3-x</sub> 20 min | 0.3            | 1.4      | 0.5            | 5.9      | 0.2            | 16.6     | 6.9          |
